# Supplementary material for: Internalized α-synuclein fibrils become truncated and resist degradation in neurons while glial cells rapidly degrade α-synuclein fibrils
Source: PubMed Central journal article supplement — bioRxiv. 2025 Jun 11:2024.06.05.597615. Originally published 2024 Jun 8. Preprint. [Version 2] doi: 10.1101/2024.06.05.597615 (PMC11185753; doi:10.1101/2024.06.05.597615), 2025-06-11
Supplement: media-1.pdf [file media-1.pdf]

## **Supplementary Information**

Table S1  
Figures S1-S9

Internalized  $\alpha$ -synuclein fibrils are rapidly truncated and resists degradation in neurons while glial cells rapidly degrade  $\alpha$ -synuclein fibrils.

Md. Razaul Karim, Emilie Gasparini, Elizabeth Tiegs, Riley Schlichte, Scott C. Vermilyea, and Michael K. Lee

| <b>Loading Controls</b>                      | <b>Host</b> | <b>Source</b>                  | <b>Reference</b> | <b>Use</b> |
|----------------------------------------------|-------------|--------------------------------|------------------|------------|
| GAPDH (D16H11)                               | Rbt         | Cell Signaling                 | 5174             | WB         |
| $\alpha$ -tubulin                            | Rbt         | Abcam                          | 4074             | WB         |
| <b><math>\alpha</math>-Synuclein Species</b> |             | <b>Company</b>                 | <b>Reference</b> | <b>Use</b> |
| $\alpha$ -Synuclein (total, Syn1)            | Rt          | BD Transduction                | 610787           | WB         |
| Hu $\alpha$ S                                | Rbt         | In House                       | [1]              | WB/ICC     |
| LB509                                        | Ms          | Abcam                          | 27766            | WB/ICC     |
| NAC-2 $\alpha$ S/N-2 $\alpha$ S              | Rbt         | Pekka Jäkälä, Kupio University | [1]              | WB         |
| Pan-Syn                                      | Rbt         | Abcam                          | ab53726          | WB         |
| <b>Glial and Neuronal Markers</b>            |             | <b>Company</b>                 | <b>Reference</b> | <b>Use</b> |
| Iba1                                         | Rbt         | Wako Chemical                  | 019-19741        | ICC        |
| GFAP                                         | Rbt         | Dako Cytomation                | Z0334            | ICC        |
| NeuN                                         | Ms          | Millipore                      | MAB377           | ICC        |
| O4                                           | Ms          | R&D System                     | MAB1326          | ICC        |
| <b>Autophagy/Lysosome Function/Organelle</b> |             | <b>Company</b>                 | <b>Reference</b> | <b>Use</b> |
| LC3                                          | Rbt         | Cell Signaling                 | 2775             | WB         |
| p62                                          | Rbt         | Cell Signaling                 | 5114             | WB         |
| pS6                                          | Rbt         | Cell Signaling                 | 2211             | WB         |
| S6 (total)                                   | Ms          | Cell Signaling                 | 2317             | WB         |
| 4EBP                                         | Rbt         | Cell Signaling                 | 9644             | WB         |
| CTSD                                         | Rbt         | Abcam                          | ab75852          | WB/ICC     |
| Gal3                                         | Ms          | Abcam                          | Ab2785           | ICC        |
| Poly-Ubq                                     | Rbt         | Dako                           | Z0458            | WB/ICC     |
| Grp78                                        | Rbt         | Novus                          | NB300-520        | ICC        |
| Lamp1                                        | Rbt         | LS-Bio                         | LS-B4246         | WB, ICC    |
| Lamp2                                        | Rbt         | LS-Bio                         | LS-B581          | ICC        |
| EEA1                                         | Rbt         | Gene Tex                       | GTX 109638       | WB, ICC    |
| GM-130                                       | Rbt         | Novus                          | NBP2-53420       | ICC        |
| p62                                          | Ms          | Abcam                          | Ab56416          | ICC        |
| LC3                                          | Rbt         | Cell Signaling                 | 3868             | ICC        |

**Table S1.** List of primary antibodies utilized in experiments. Ms, Mouse; Rt, Rat; Rbt, Rabbit; WB, western blot; ICC, immunocytochemistry.

1. Li, W., et al., *Aggregation promoting C-terminal truncation of alpha-synuclein is a normal cellular process and is enhanced by the familial Parkinson's disease-linked mutations.* Proc Natl Acad Sci U S A, 2005. **102**(6): p. 2162-7.

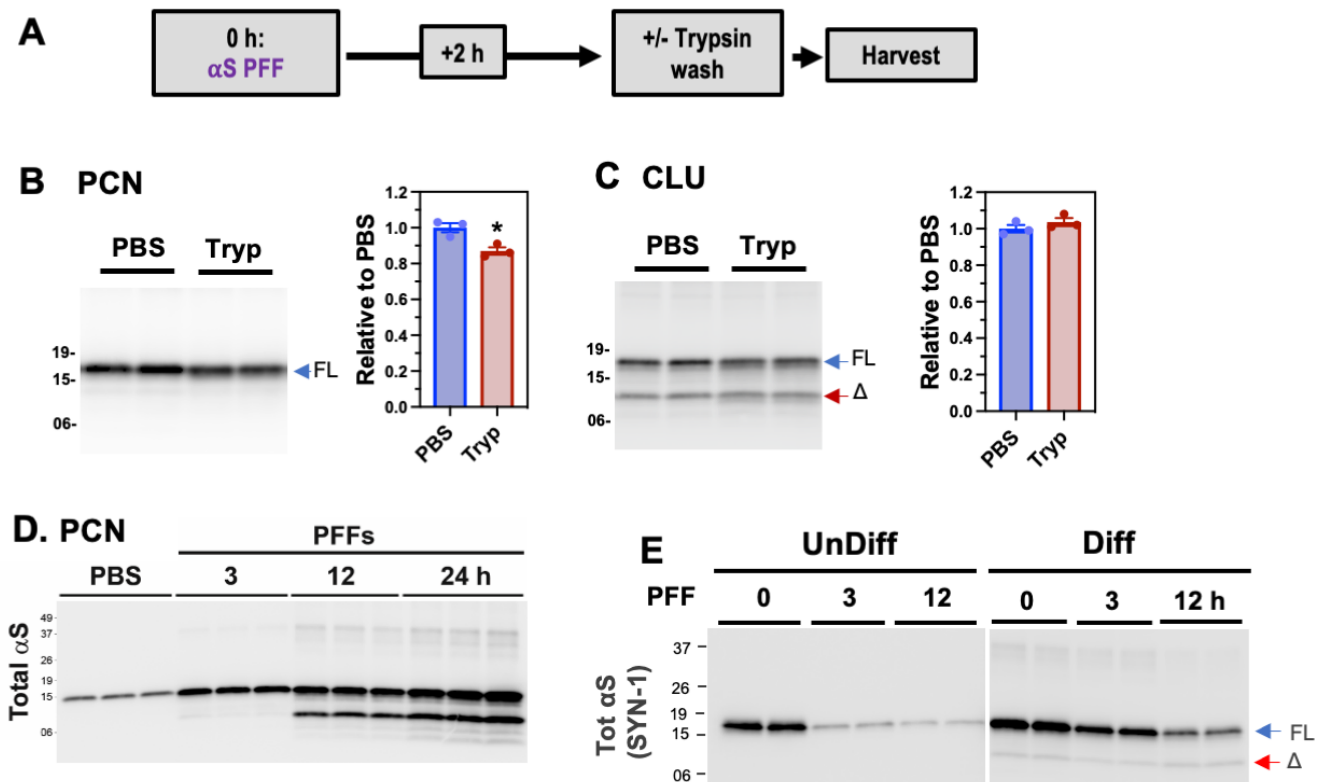

**Figure S1. Comparison of PBS wash and Trypsin wash in removing uninternalized  $\alpha$ S PFF (A-D) and metabolism of  $\alpha$ S PFF in SH-SY5Y cells (E).** Scheme (A) showing cultured primary cortical neuron (PCN, B) or CLU198 cells (CLU, C) incubated with 4  $\mu$ g/ml  $\alpha$ S PFF for 2 hours and washed with PBS or trypsin before the harvest. The levels of Tot  $\alpha$ S were detected by immunoblot analysis. **B)** In PCN, approximately ~85-90% residual  $\alpha$ S following PBS wash is accounted by trypsin resistant fraction. **C)** In CLU cells, the amount of residual  $\alpha$ S is not different between PBS and trypsin-washed cells. These results indicate that the bulk of residual  $\alpha$ S following PBS wash is internalized  $\alpha$ S (\* $p$ <0.05, t-test, Mean $\pm$ SEM; n=3). **D)** Analysis  $\alpha$ S PFF uptake in PCN without washing shows that  $\alpha$ S continues to increase past the 24 hours following PFF treatment. Thus, uptake of new  $\alpha$ S PFF occurs for prolong periods without washing. **E)** Uptake and metabolism of  $\alpha$ S PFF in an undifferentiated (UnDiff) and neuronally differentiated (Diff) human neuroblastoma cell line (SH-SY5Y cells). Immunoblot analysis of total lysates for  $\alpha$ S shows that, similar to the CLU cells (Fig. 2), internalized  $\alpha$ S is rapidly degraded in undifferentiated SH-SY5Y cells. In differentiated SH-SH5Y cells, internalized  $\alpha$ S is more stable with the presence of the truncated  $\alpha$ S ( $\Delta$ ).

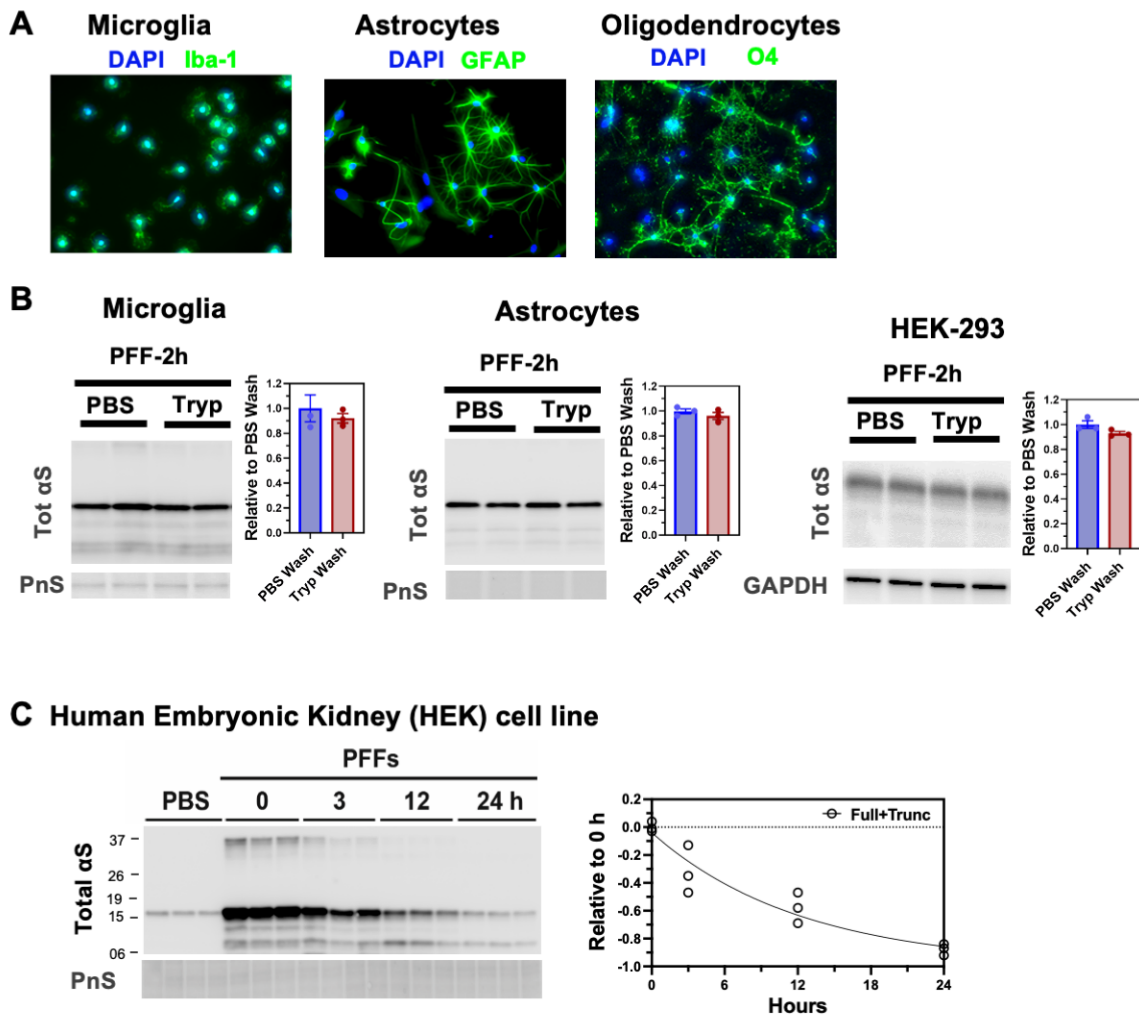

**Figure S2. (A, B) Uptake of  $\alpha$ S pre-formed fibrils (PFFs) in glial cells. (A)** primary glial cells were isolated and cultured from newborn mouse pup's cortex (See Methods and Materials) and the purity was confirmed by staining with specific cellular marker Iba1, GFAP, and O4 antibodies for microglia, astrocytes, and oligodendrocytes, respectively. **(B)** Indicated cells were also incubated with 4  $\mu$ g/ml  $\alpha$ S PFF for 2 hours followed by PBS or trypsin wash before harvesting. The levels of Tot  $\alpha$ S were detected, (Mean $\pm$ SEM; n=3). **(C) Degradation of  $\alpha$ S PFFs in HEK-293 cells.** Cells were pre-incubated for 2h with 4  $\mu$ g/ml  $\alpha$ S PFF followed by trypsin wash. After washing, cells were replenished with full media and incubated for the indicated time and levels of Tot  $\alpha$ S were detected. The graph shows the amount of residual  $\alpha$ S remaining from the 0 h time point. Ponceau S (PnS) protein stain or GAPDH were used to confirm loading.

**A. PCN**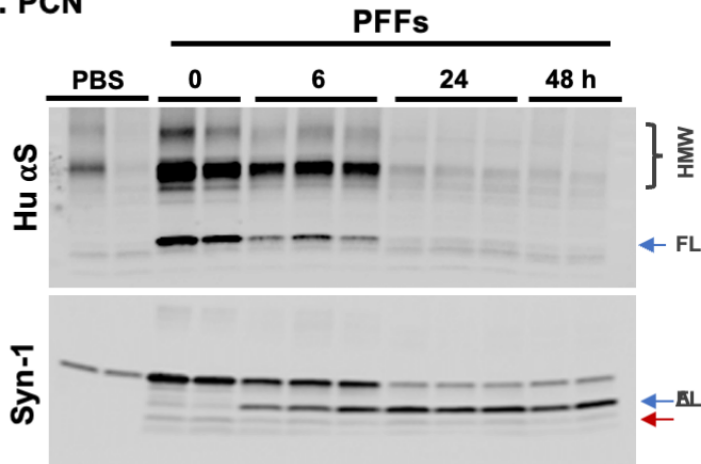**B. Oligodendrocytes**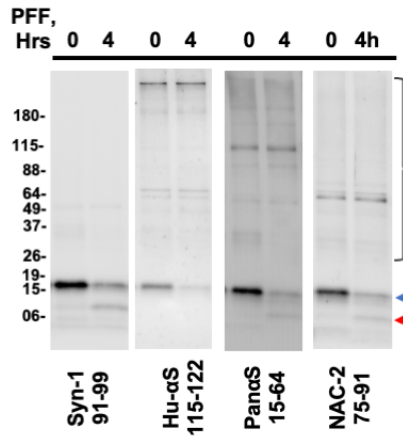**C. CLU-198**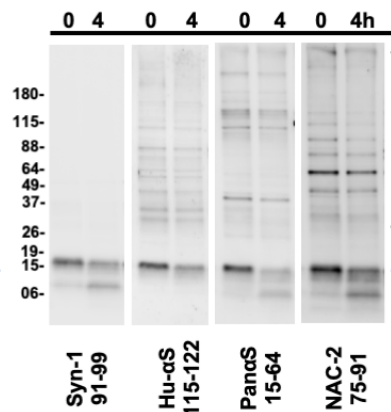**D. PMG**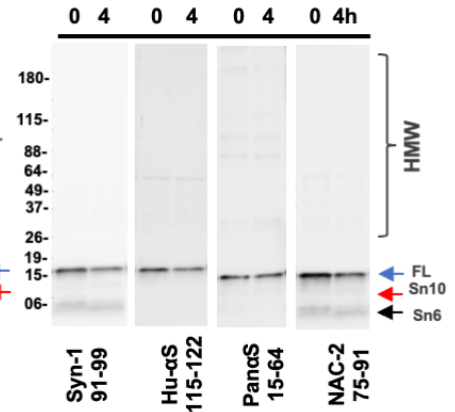

**Figure S3. Metabolism of the C-terminal  $\alpha$ S epitope in neurons and glial cells.** (A) Primary cortical neurons (PCN) were pre-incubated for 2h with 4  $\mu$ g/ml  $\alpha$ S PFF. After washing off excess PFF, cells were replenished with full media and incubated for the indicated time. Total lysates were used for  $\alpha$ S Immunoblot analysis using Hu $\alpha$ S specific (top) and Syn-1 (bottom) antibodies. Since the epitope for Hu $\alpha$ S antibody is located within the C-terminal region (amino acids 115-122), the results show that internalized  $\alpha$ S is C-terminally truncated. (B) Primary oligodendrocytes, (C) neuronally differentiated CLU-198 cells, and (D) Primary microglia (PMG) were pre-incubated for 2h with 4  $\mu$ g/ml  $\alpha$ S PFF followed by trypsin wash. The cells were replenished with full media and incubated for 4 hours before harvesting. Total lysates were used for epitope mapping of the truncated  $\alpha$ S. In all cells, the C-terminal Hu $\alpha$ S epitope is missing in the truncated variants. While the N-terminal epitope recognized by the Pan- $\alpha$ S antibody is present in FL and Sn10 variants, the N-terminal region is missing in lower MW variant(s) (e.g.Sn6).

### A. Mouse Primary cortical neuron (PCN)

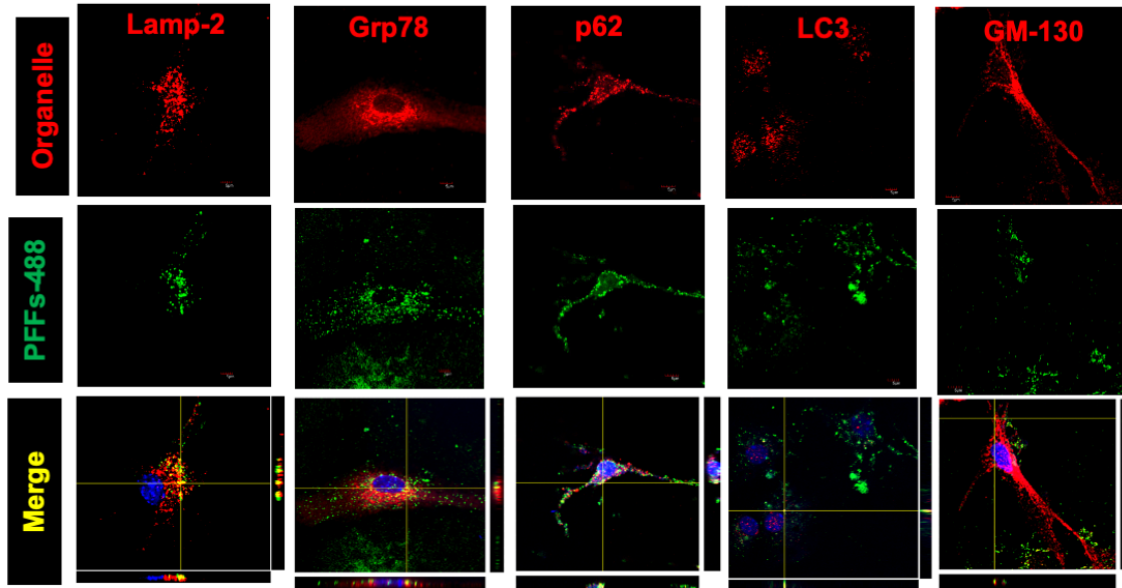

### B. Mouse primary microglia (PMG)

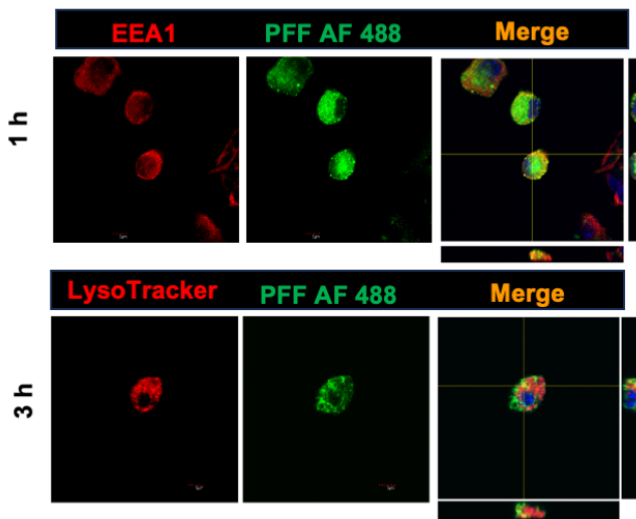

### C. Mouse Primary astrocytes

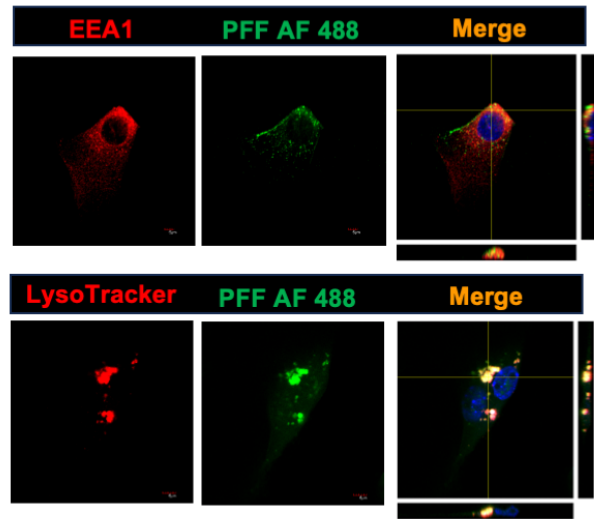

**Figure S4. Localization of internalized  $\alpha$ S pre-formed fibrils (PFFs) with intracellular organelles.** (A) Primary cortical neurons (PCN) were treated with PFFs/PFFs-AF488 for 3 hours and the cells were washed with trypsin to remove excess PFFs before fixing cells. PFFs-AF488 (green) were colocalized with various organelle markers: Lysosome, Lamp-2; Endoplasmic Reticulum, Grp-78; Lysosomal substrate, p62; Autophagosome, LC3; Golgi, GM130. (B,C) Internalized  $\alpha$ S PFFs traffic to endosome and Lysosomes in glial cells. Primary microglia (PMG) (B) and astrocytes (C) were treated with PFFs-AF488 and colocalized with the early endosome marker (EEA1) (red) at 1 h and Lysosomes (LysoTracker) at 3 h.

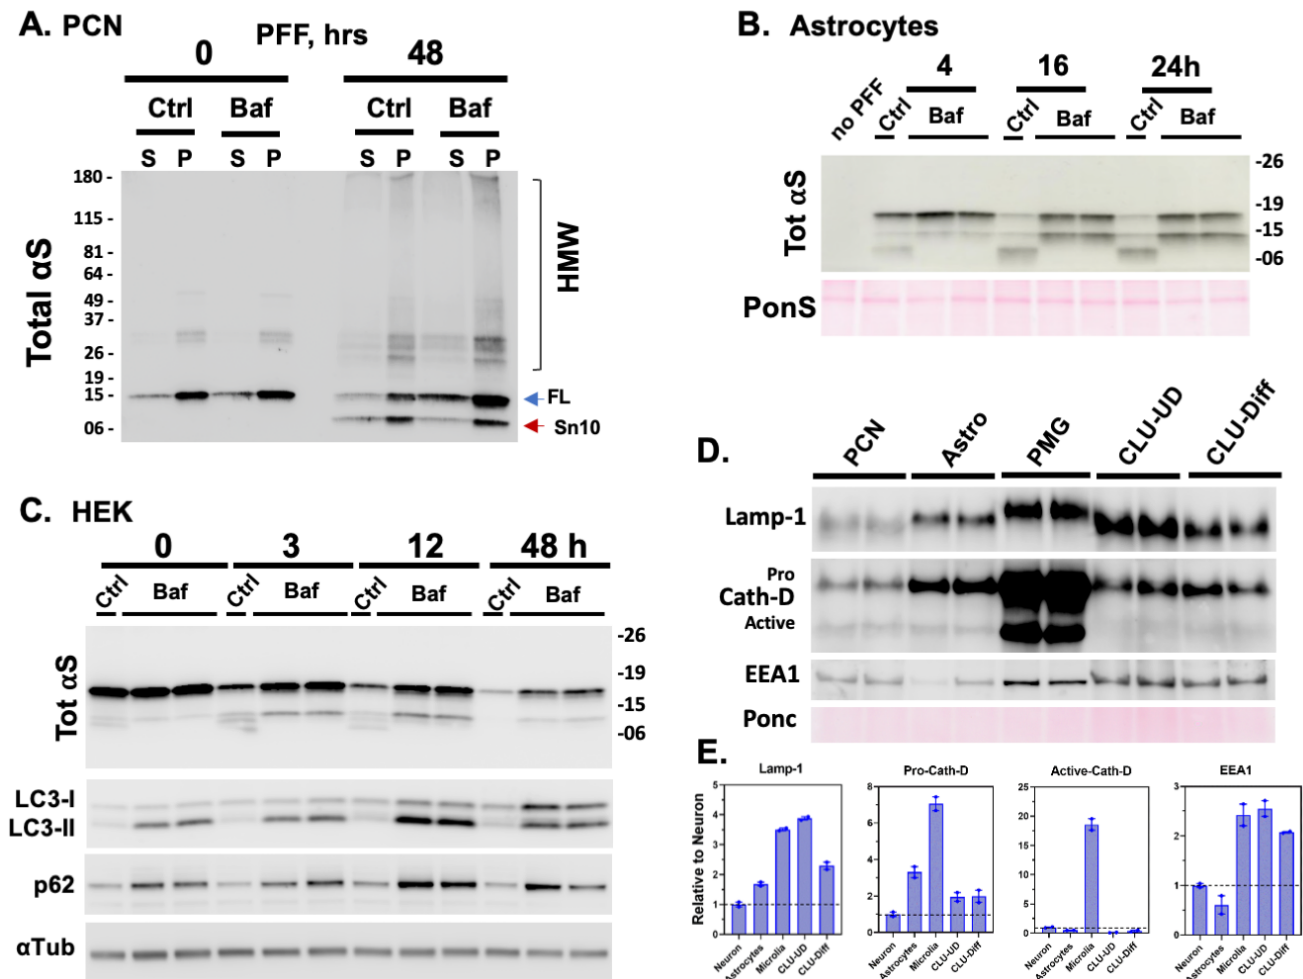

**Figure S5. (A) Lysosomal inhibition stabilizes both low and high molecular weight  $\alpha$ S.** Mouse primary cortical neurons (PCN) were pre-incubated for 2h with 100 nM bafilomycin A1 prior addition of 4  $\mu$ g/ml pre-formed fibrils  $\alpha$ S (PFF) for 2h. After trypsin-wash, cells were replenished with full media and Baf for the indicated time. Triton X-100 soluble (S) and insoluble (P) fractions were separated and analyzed for Tot  $\alpha$ S (Syn-1) and Pan-S by immunoblotting. **(B, C) Lysosome inhibition stabilizes internalized  $\alpha$ S PFF in astrocytes (B) and HEK293 cells (C).** Cells were pre-incubated for 100 nM Baf and 4  $\mu$ g/ml  $\alpha$ S-PFF and lysates were collected at indicated times. Immunoblot analysis of  $\alpha$ S shows that while most of  $\alpha$ S is metabolized by 12-16 hours in astrocytes (B) and HEK293 cells (C). Baf treatment leads to continued accumulation of  $\alpha$ S, even at 24-48 h. Also shown is Ponceau-S total protein stain or  $\alpha$ -tubulin immunoblot to control for equal loading. Immunoblot analysis of LC3-I/-II and p62 verify the inhibition of lysosomes. **(D, E) Neuronal cells have lower lysosomal markers. D)** Primary cortical neuron (PCN), primary astrocytes, primary microglia (PMG), and differentiated or undifferentiated mouse hippocampal CLU cells were harvested, and lysosomal markers (Lamp-1, Cathepsin D, and EEA1) were evaluated by immunoblotting. **(E)** Quantitative analysis of immunoblot shown in D. While statistical analysis was not done, the duplicate samples clearly show that lysosomal markers are lower in neurons than in non-neuronal cells.



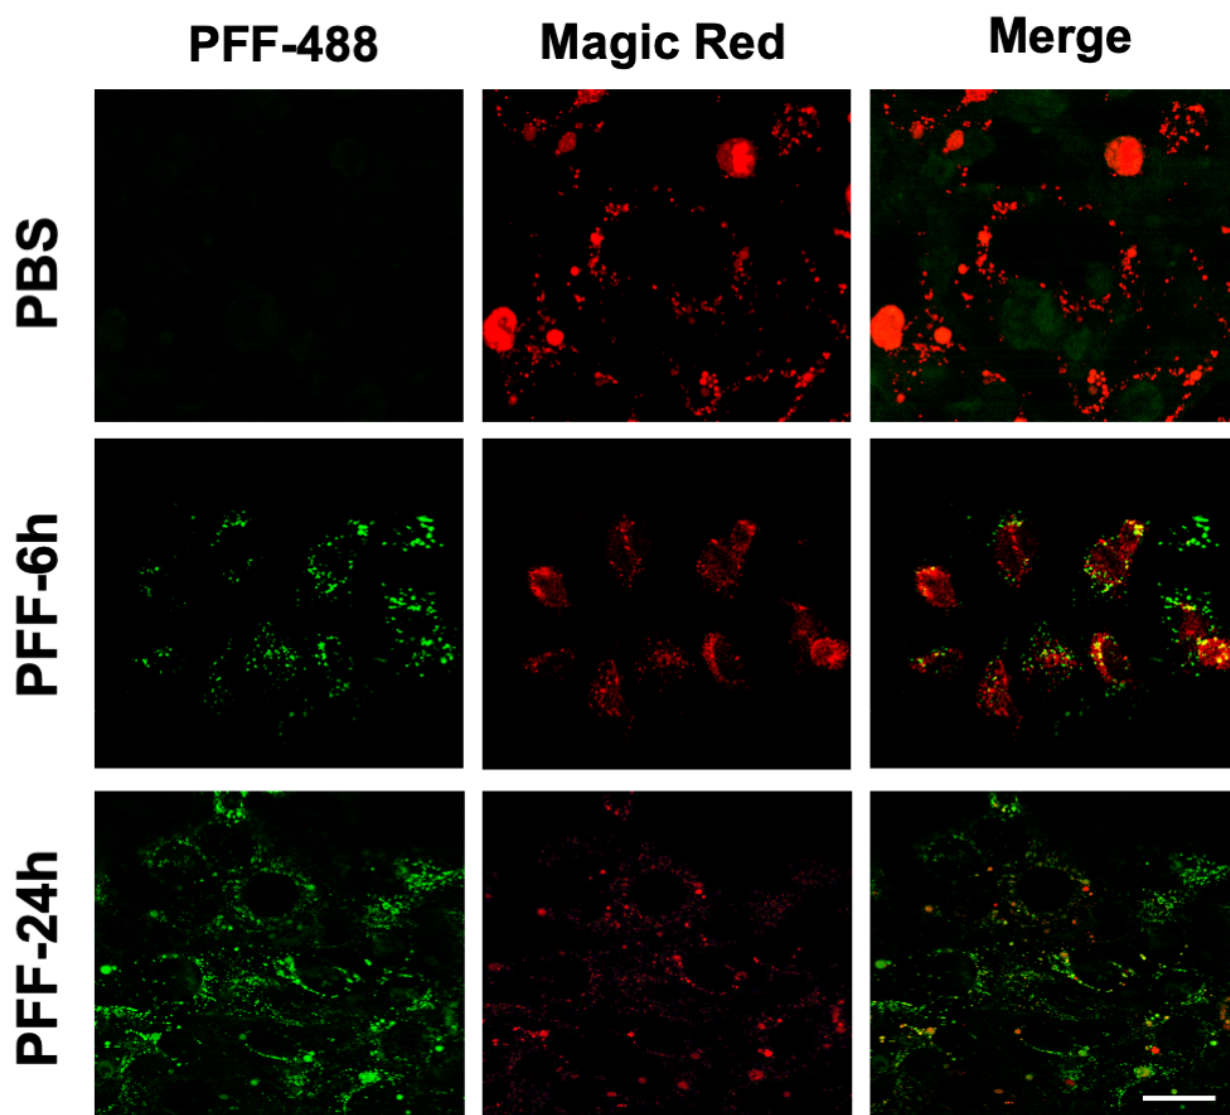

**Figure S6. Internalized aS PFFs inhibit lysosomal function in neuronal cells.** Neuronally differentiated CLU198 cells were treated with PFF-AF488, washed, and incubated for 6- or 24-h before confocal live cell imaging. The cells were also treated with Magic Red Cathepsin-B assay reagent for the last hour before imaging. The overall Magic Red signal appears reduced in PFF-treated cells, even at 6-h post-PFF treatment. Quantitative analyses of 24 h time point is shown in Fig. 8. Bar=10  $\mu$ m.



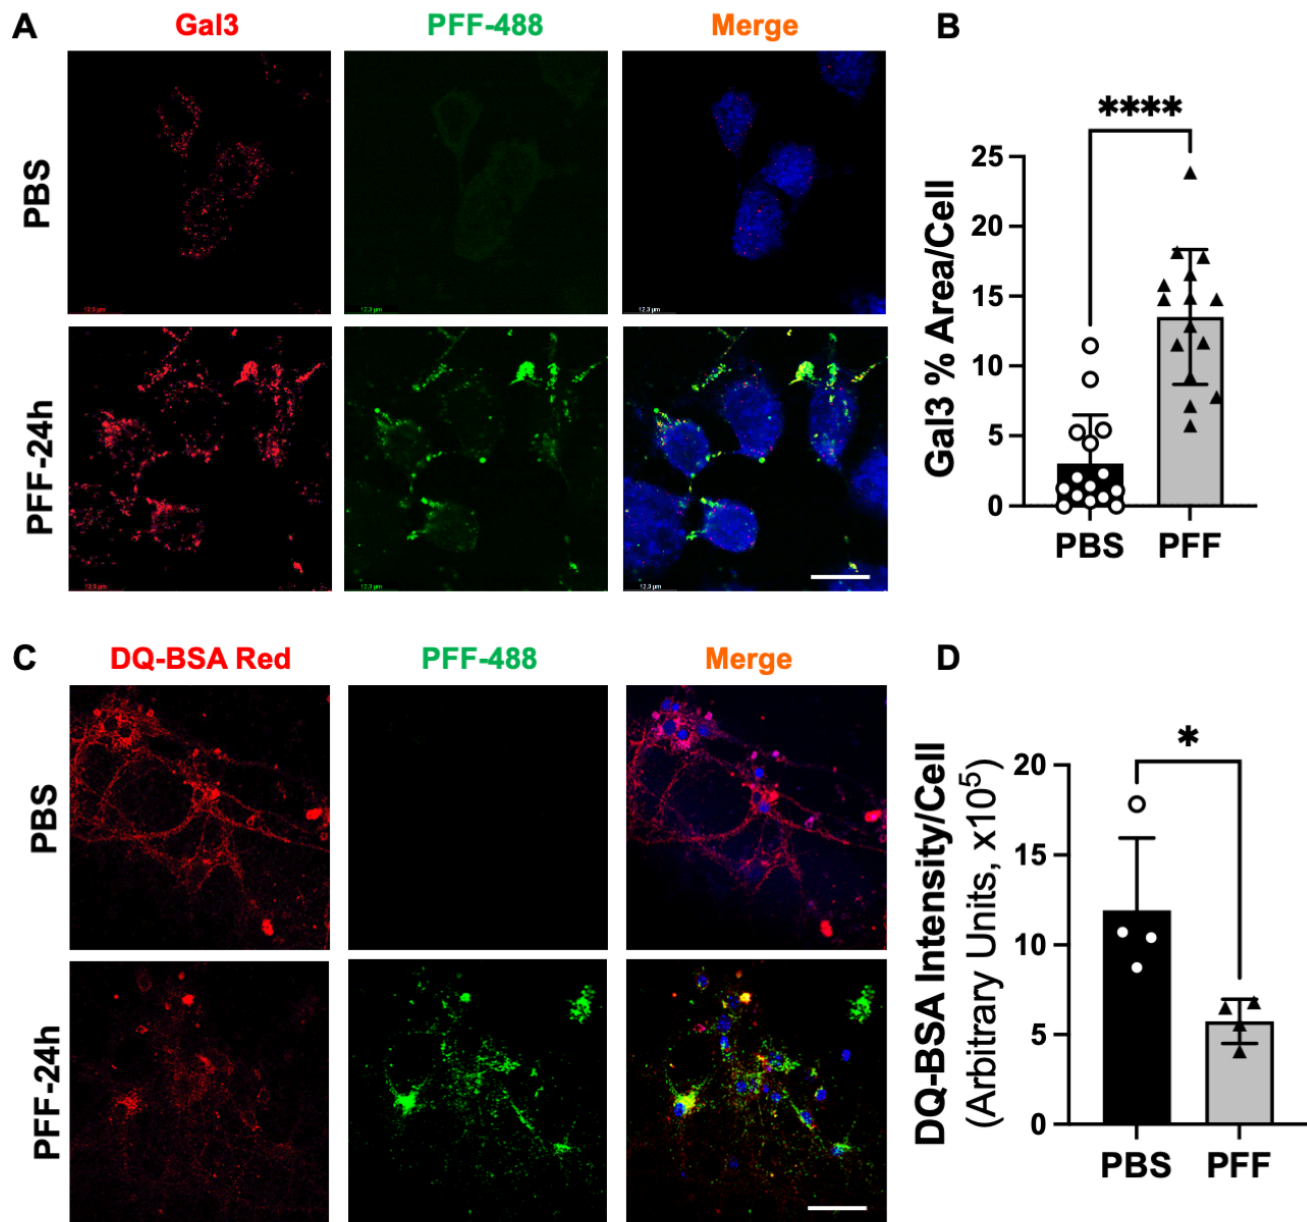

**Figure S7. Internalization of aS PFFs leads to lysosomal damage and lysosomal dysfunction in neuronal cells.** **A, B)** Neuronally differentiated CLU198 cells were treated with PFF-AF488, washed, and incubated for 24-h, fixed in 4% PFA, and stained for Gal3, an indicator of lysosomal damage. The cells were imaged using confocal microscopy. Representative confocal images show increased Gal3 staining in PFF-treated cells (**A**). **C, D)** Primary cortical neurons were treated with PFF-AF488, washed, and incubated for 24-h and treated with DQ-BSA Red, which is hydrolyzed in functional lysosomes to produce red fluorescence. Confocal images show that PFF treatment is associated with reduced DQ-BSA Red signal (**C**). Quantitative analysis of total DQBSA Red signal intensity, normalized to the number of cells, confirms that PFF treatment leads to lysosomal dysfunction in neurons (**D**). \* $p < 0.05$ , unpaired t-test,  $n = 4$  independent cultures. Bar = 10  $\mu\text{m}$  (A), 50  $\mu\text{m}$  (C).

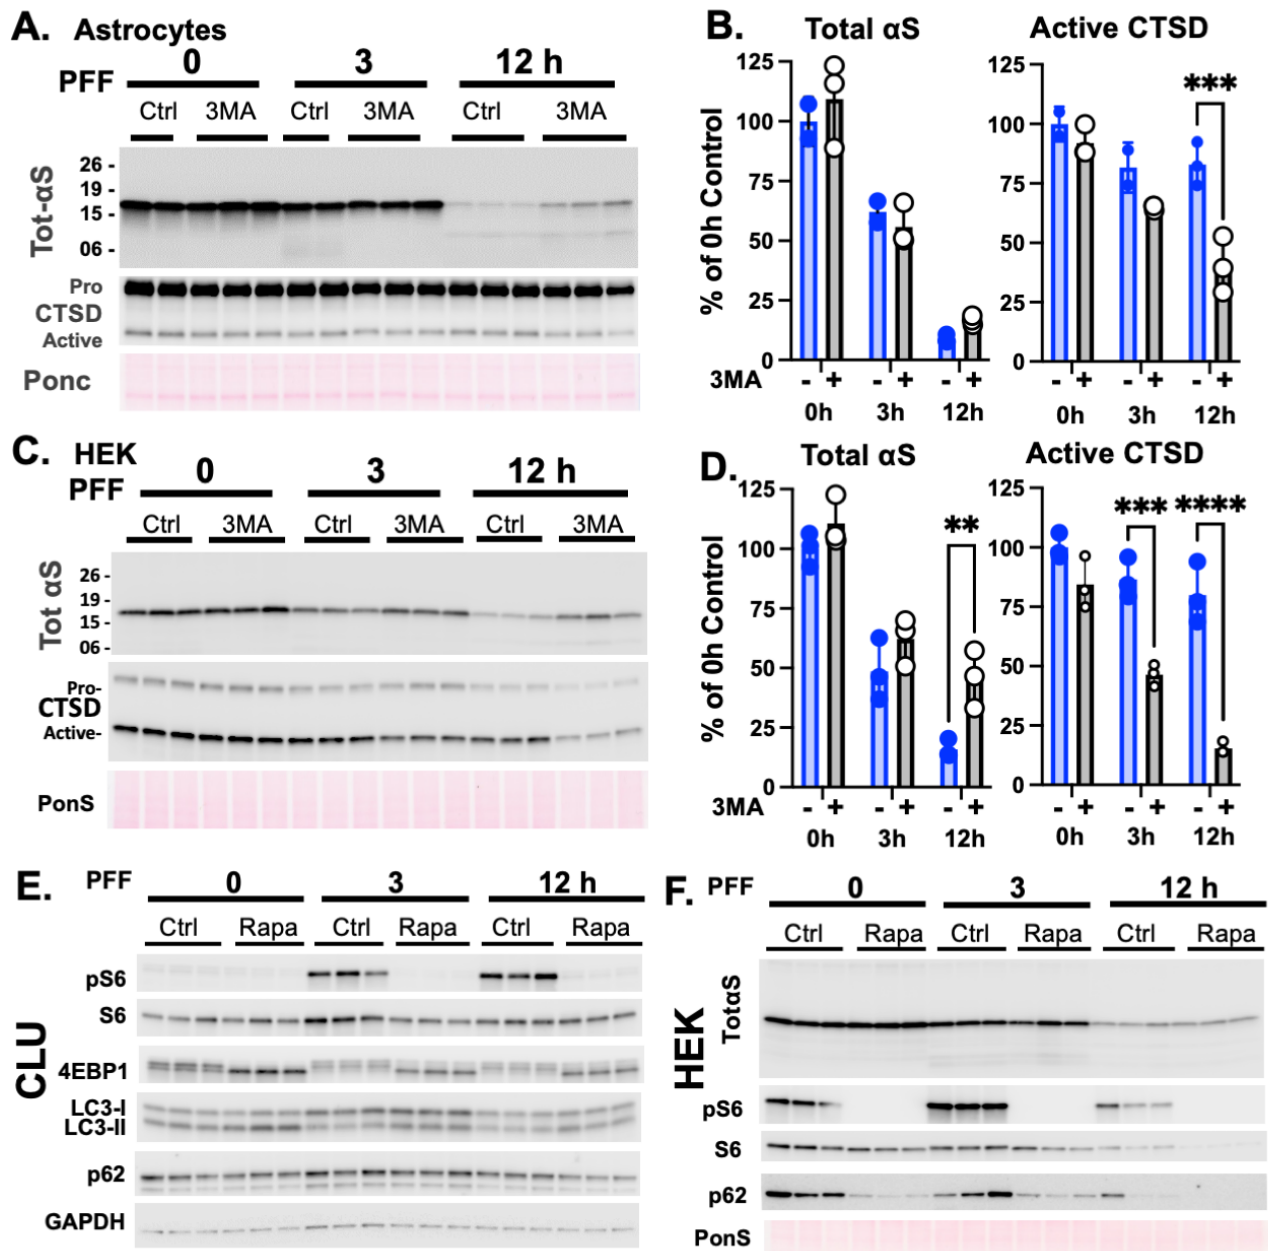

**Figure S8. (A-D) Inhibition of autophagy leads to modest lysosomal inhibition with a modest impact on  $\alpha$ S accumulation in astrocytes and HEK293 cells.** Primary cultures of astrocytes (A, B) and HEK293 cell line (C, D) treated with 3MA to inhibit autophagy as described in Figure 8. The levels of internalized  $\alpha$ S PFF and the lysosomal protease, Cathepsin-D (CTSD), determined by immunoblot analysis, show that 3MA treatment leads to a modest but significant increase in  $\alpha$ S levels in HEK293 cells (C, D) and decreased active CTSD levels in both Astrocytes and HEK293 cells (B, D).  $**p < 0.01$ ,  $***p < 0.001$ ,  $****p < 0.0001$ , Two-way ANOVA. **(E, F) Rapamycin increases autophagy but does not affect  $\alpha$ S PFF metabolism.** (E) CLU198 shown in Fig. 9B analyzed for mTOR inhibition (pS6, 4EBP) and autophagy (LC3-II and p62). In addition to inhibition of mTOR, Rapa treatment leads to increased LC3-II and reduced p62, indicating to enhanced autophagy. (F) In HEK293 cells, Rapa treatment does not affect the metabolism of internalized  $\alpha$ S.

### A. CLU-198

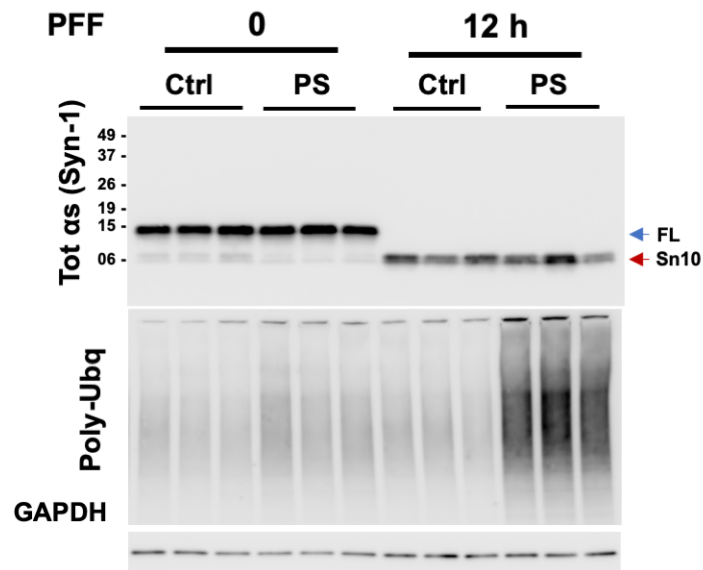

### B. HEK

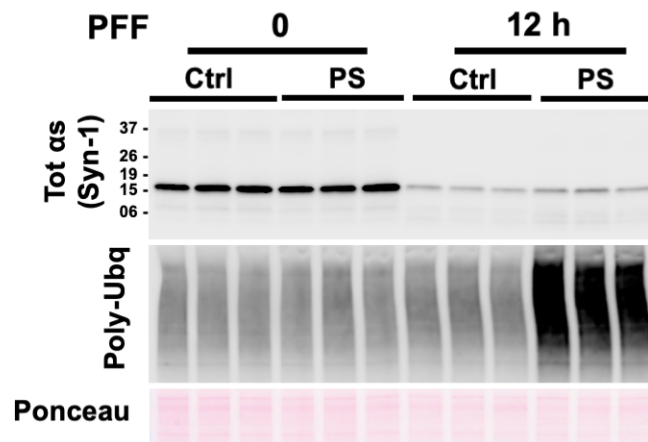

**Figure S9. Proteasome inhibition does not impact  $\alpha$ S PFF processing/metabolism.** (A) Differentiated mouse hippocampal cell CLU-198 and (B) Human embryonic kidney HEK cells were pre-incubated with 15 nM PS-341 (PS; 4h) and 4  $\mu$ g/ml pre-formed fibrils  $\alpha$ S (PFFs) for 2h before the trypsin-wash. After the trypsin wash, cells were replenished with full media and PS for the indicated time. Tot  $\alpha$ S (Syn-1), Poly-Ubiquitin (Poly-Ubq), and GAPDH were detected by immunoblotting analysis. Ponceau S was used in B. PS-341 treatment do not impact  $\alpha$ S truncation in CLU-198 cells (A) and does not impact  $\alpha$ S metabolism in HEK293 cells (B).
